# Supplementary material for: Vitamin B12 is not shared by all marine prototrophic bacteria with their environment
Source: PubMed Central journal article supplement (PMC10203341; doi:10.1038/s41396-023-01391-3), 2023-03-13
Supplement: 41396_2023_1391_MOESM5_ESM.pdf [file 41396_2023_1391_MOESM5_ESM.pdf]

*T. pseudonana*

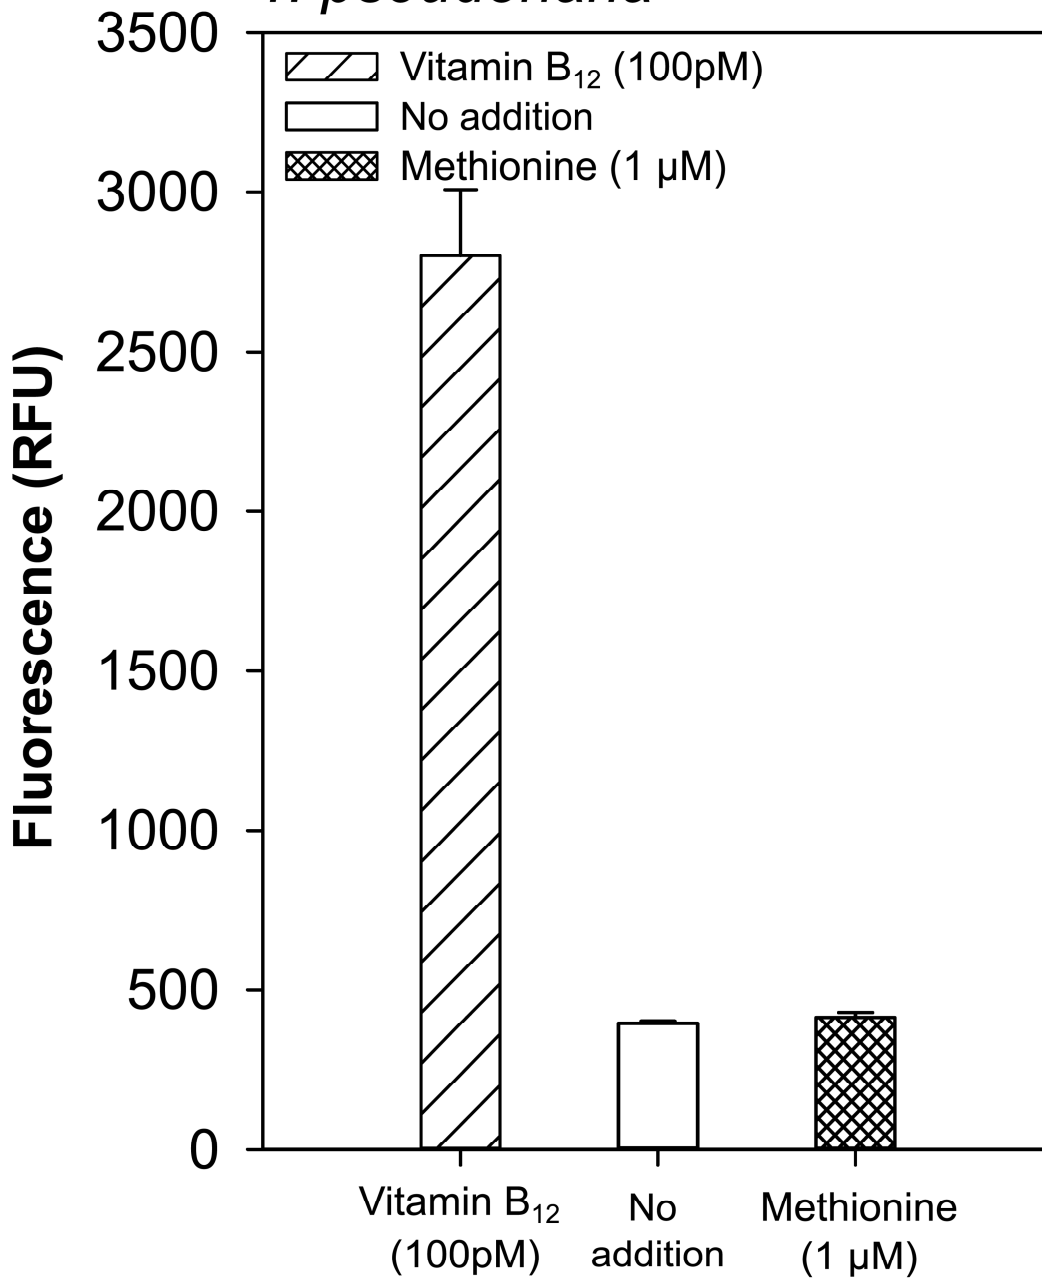

**Supplementary Figure 1:** Presented here is the maximum growth (determined by the relative fluorescence unit) in monocultures of *T. pseudonana* with the addition of B<sub>12</sub> (100 pM), methionine (1 μM) and without any additive.
