# Supplementary material for: Vitamin B12 is not shared by all marine prototrophic bacteria with their environment
Source: PubMed Central journal article supplement (PMC10203341; doi:10.1038/s41396-023-01391-3), 2023-03-13
Supplement: 41396_2023_1391_MOESM6_ESM.pdf [file 41396_2023_1391_MOESM6_ESM.pdf]

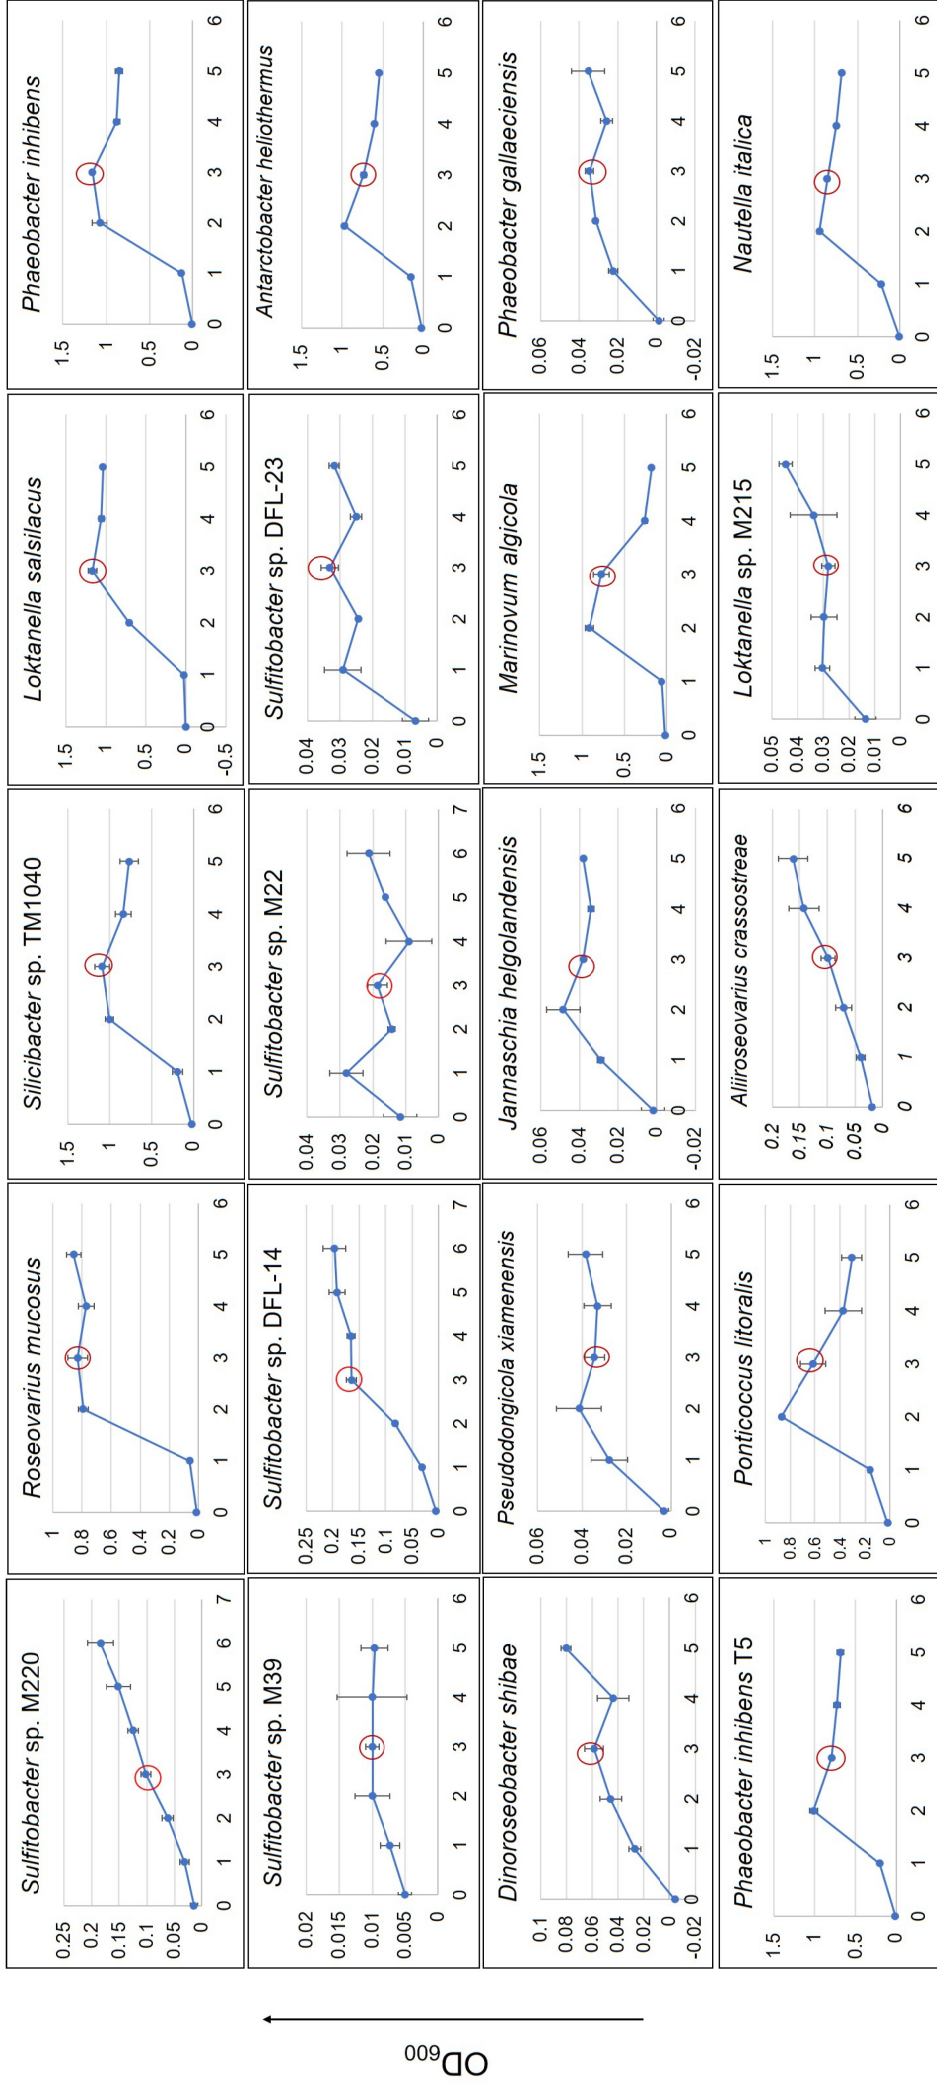

**Supplementary Figure 2:** Shown are the mean growth curves of all bacterial strains in mono-culture from which the intracellular and extracellular B<sub>12</sub> concentrations were measured. Growth was monitored over time (days) using optical density (OD<sub>600</sub>). The red circle represents the time of sampling for intracellular and extracellular B<sub>12</sub> detection.
