# Supplementary material for: Vitamin B12 is not shared by all marine prototrophic bacteria with their environment
Source: PubMed Central journal article supplement (PMC10203341; doi:10.1038/s41396-023-01391-3), 2023-03-13
Supplement: 41396_2023_1391_MOESM7_ESM.pdf [file 41396_2023_1391_MOESM7_ESM.pdf]

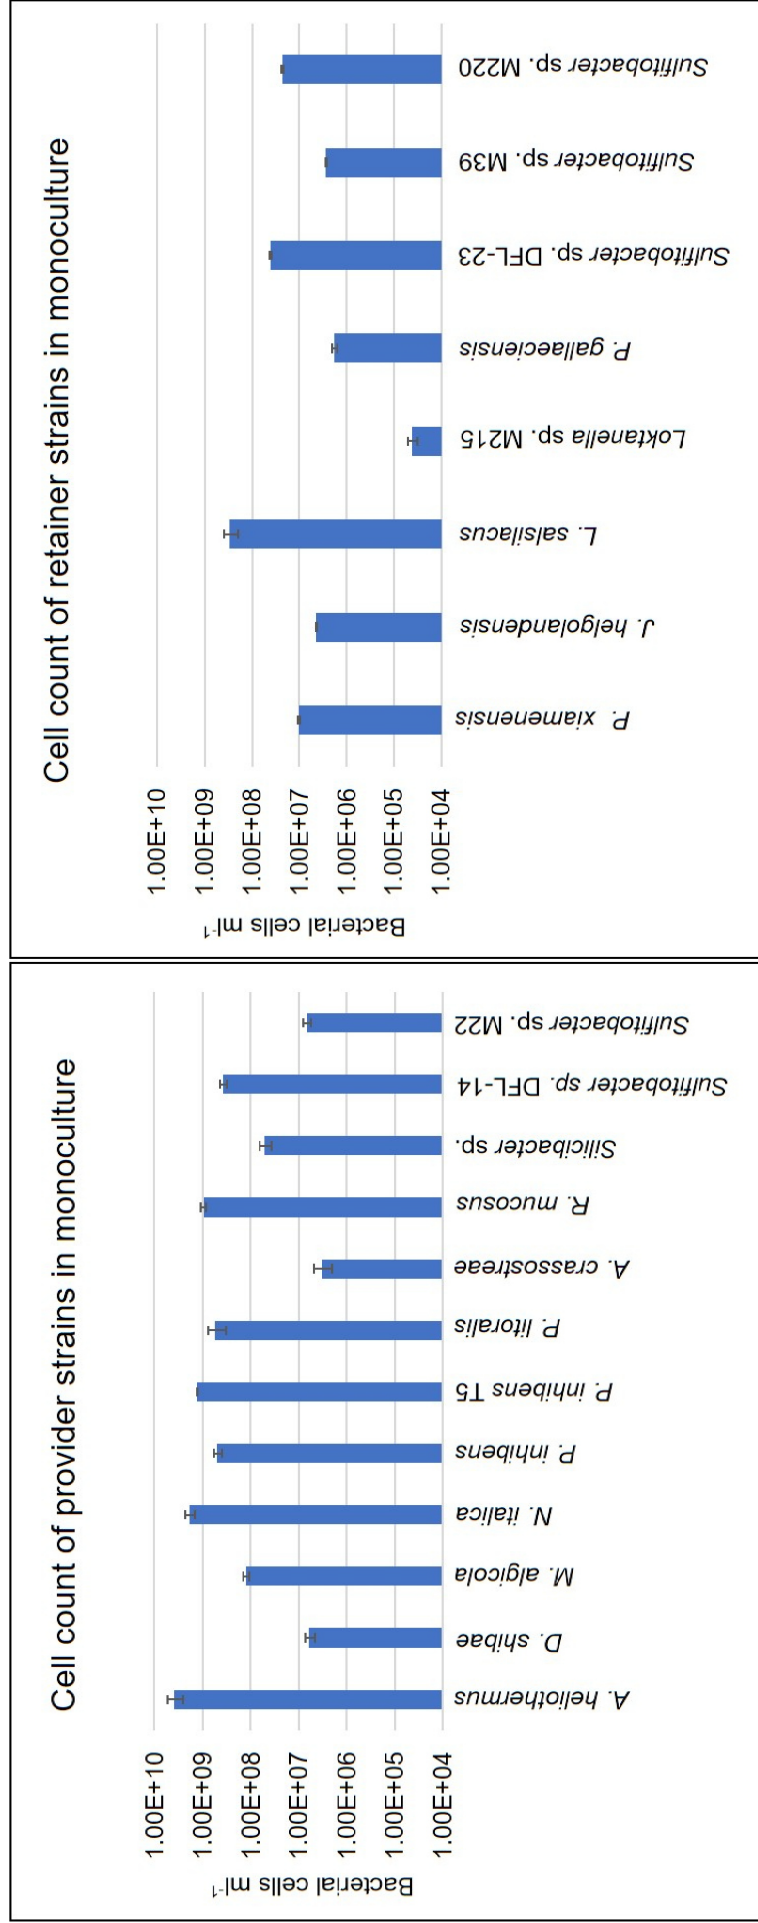

**Supplementary Figure 3:** Shown here are the cell counts measured by flow cytometry at the time of sampling for the detection of intracellular and extracellular B<sub>12</sub> concentrations of prototrophic B<sub>12</sub> bacteria in monocultures.
