# Supplementary material for: Vitamin B12 is not shared by all marine prototrophic bacteria with their environment
Source: PubMed Central journal article supplement (PMC10203341; doi:10.1038/s41396-023-01391-3), 2023-03-13
Supplement: 41396_2023_1391_MOESM8_ESM.pdf [file 41396_2023_1391_MOESM8_ESM.pdf]

*T. pseudonana* co culture with *Aliiroseovarius crassostreae* DSM 16950

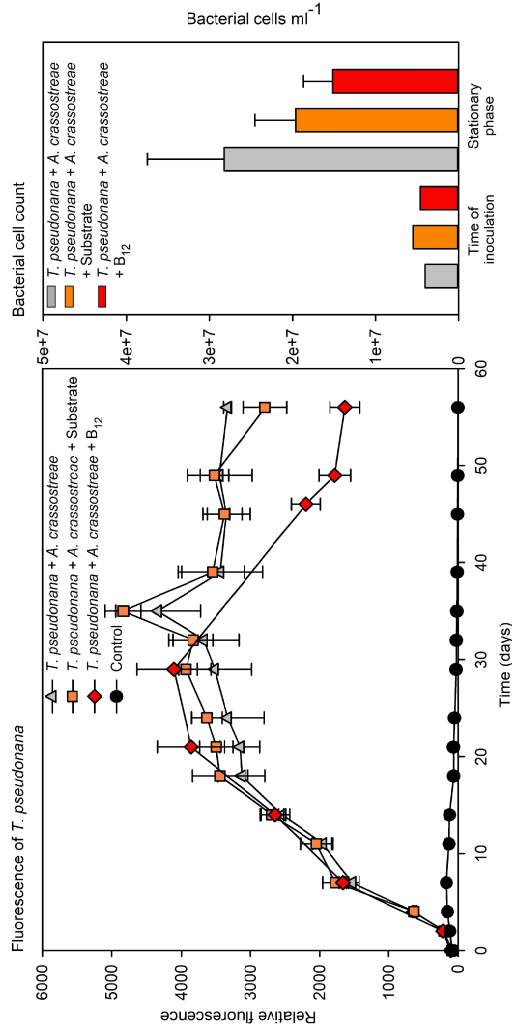

*T. pseudonana* co-culture with *Antarctobacter heliothermus* DSM 11445

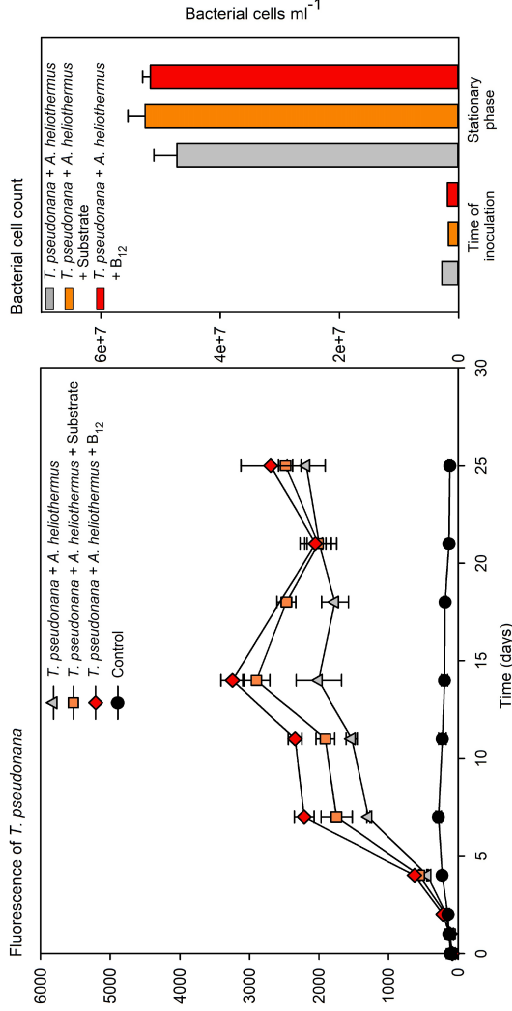

*T. pseudonana* co-culture with *Dinoroseobacter shibae* DSM 16493

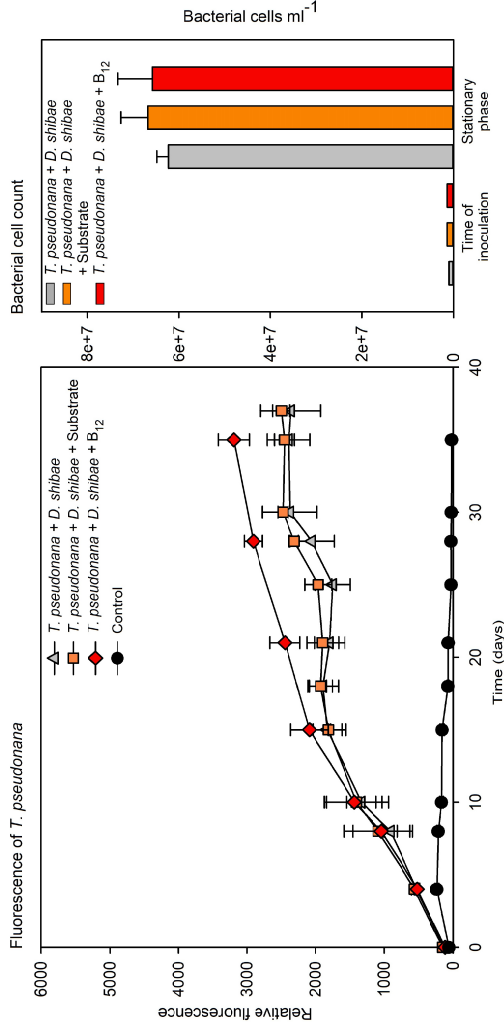

*T. pseudonana* co-culture with *Marinorivum algicola* DSM 10251

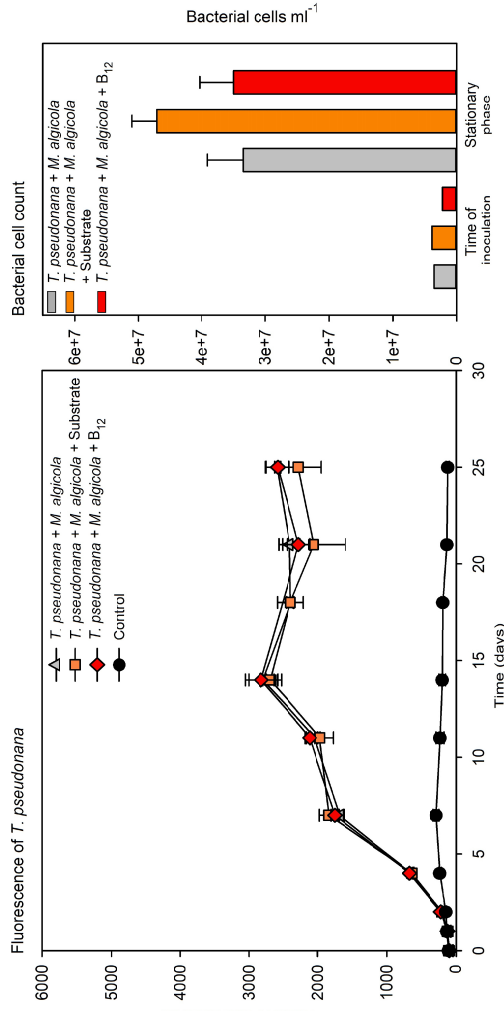

*T. pseudonana* co-culture with *Nautilia italica* DSM 26436

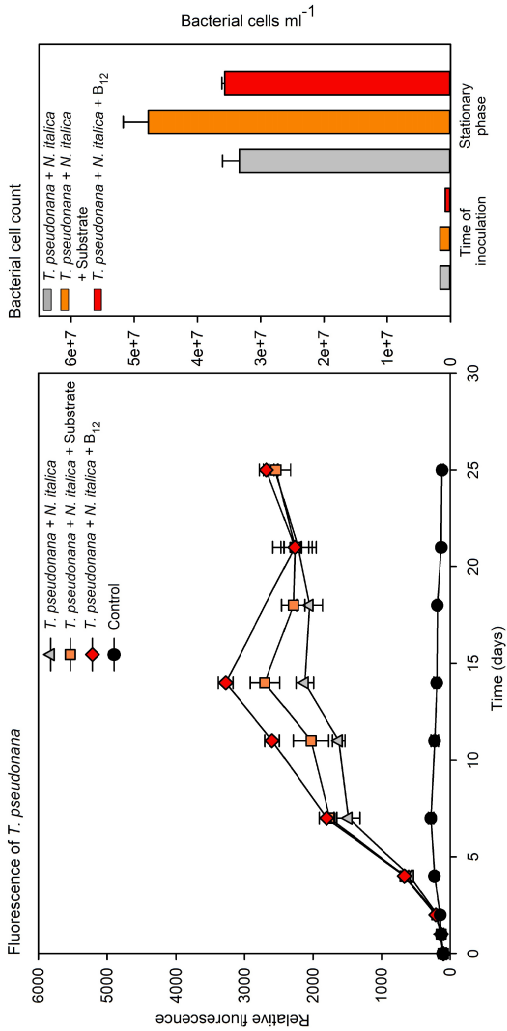

*T. pseudonana* co-culture with *Phaeobacter inhibens* DSM 17395

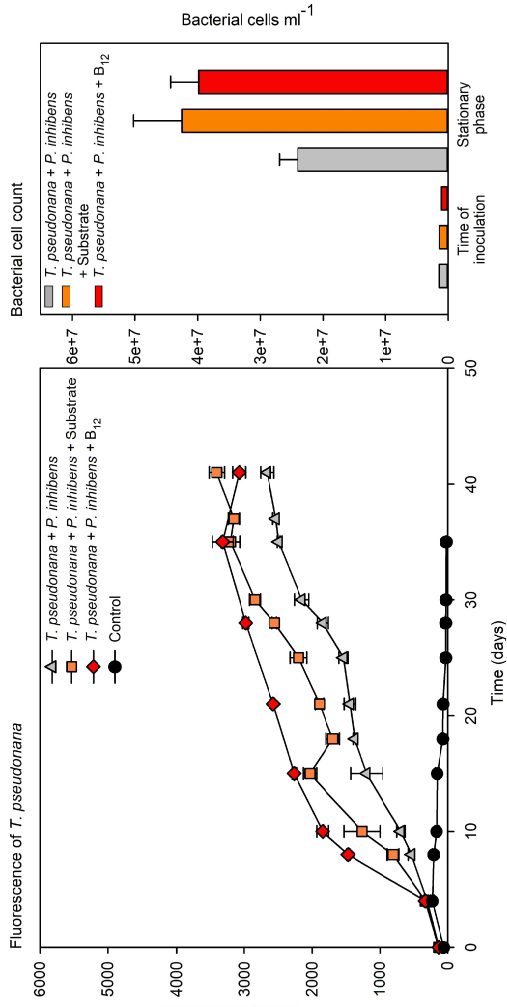

*T. pseudonana* co-culture with *Ponticoccus littoralis* DSM 18986

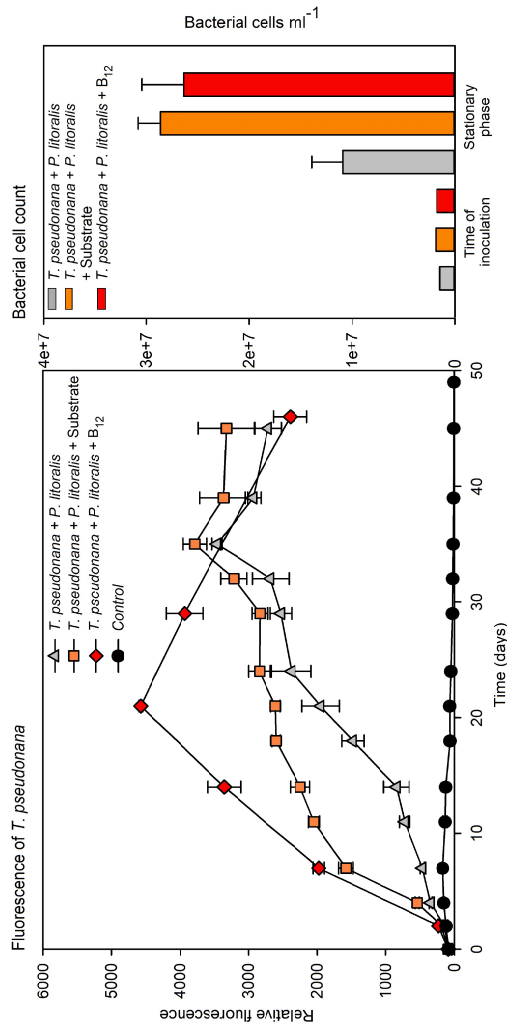

*T. pseudonana* co-culture with *Ruegeria conchae* DSM 29317

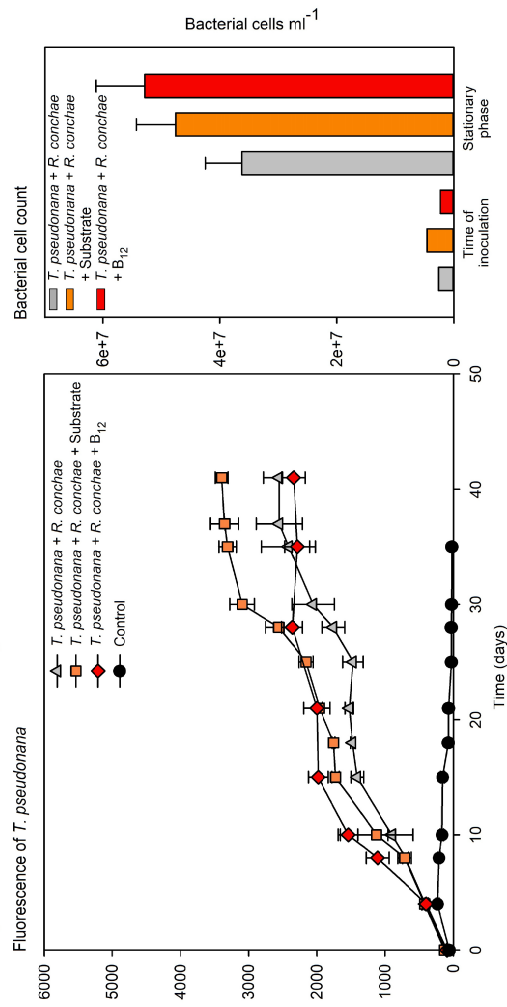

*T. pseudonana* co-culture with *Roseovarius marinus* DSM 25228

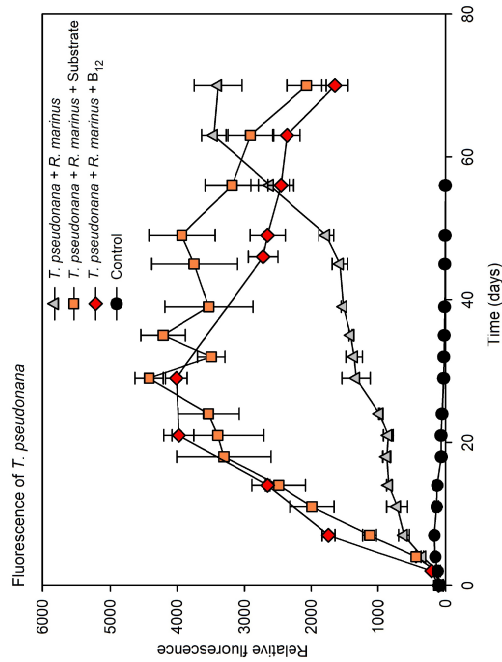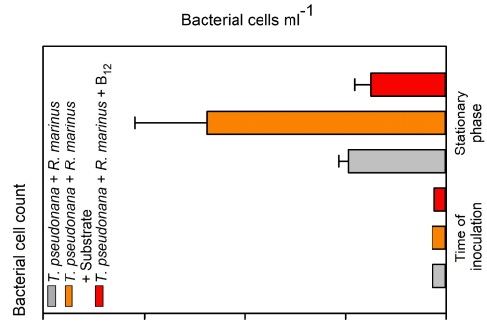

*T. pseudonana* co-culture with *Roseovarius mucosus* DSM 17069

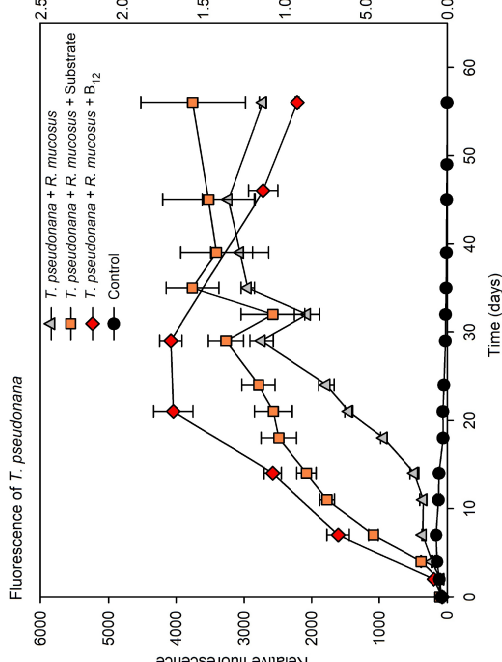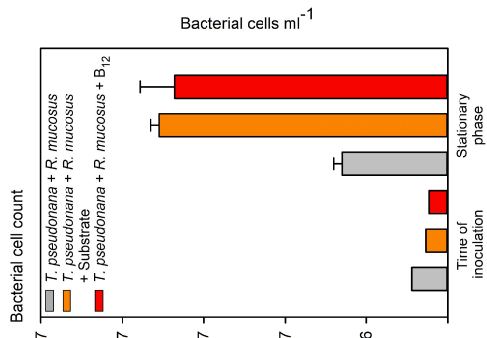

*T. pseudonana* co-culture with *Roseovarius nubinhibens* DSM 15170

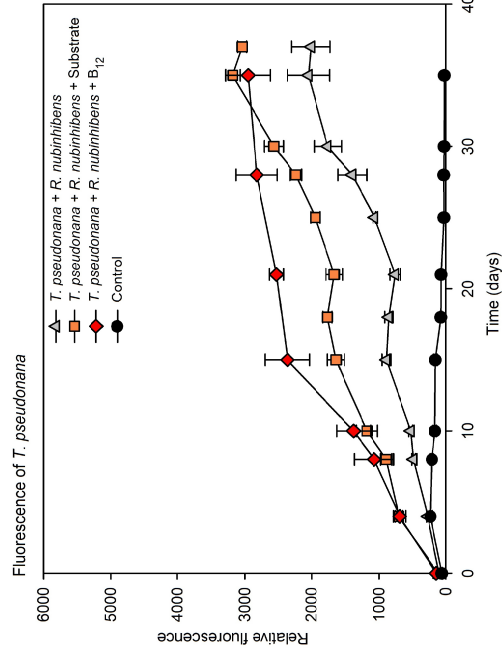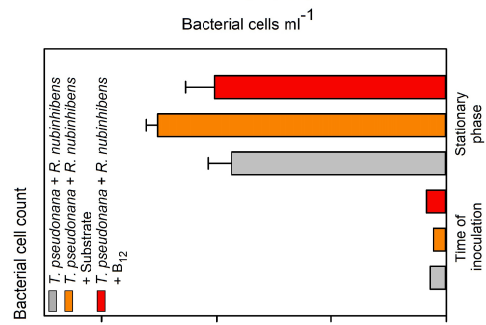

*T. pseudonana* co-culture with *Sulfitobacter mediterraneus* DSM 12244

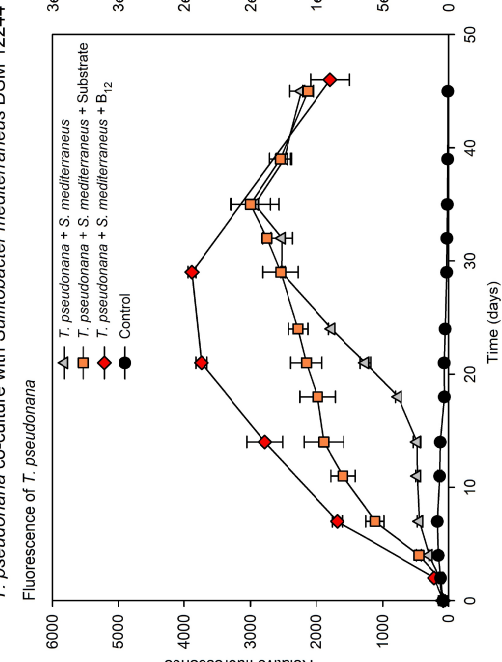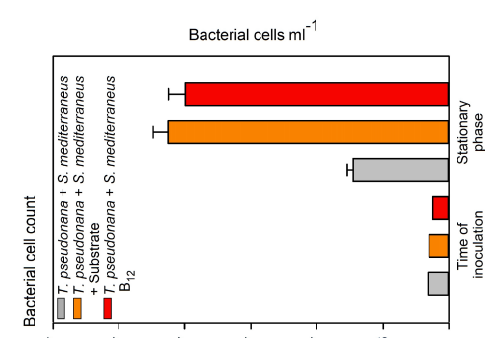

*T. pseudonana* co-culture with *Silicibacter* sp. TM1040

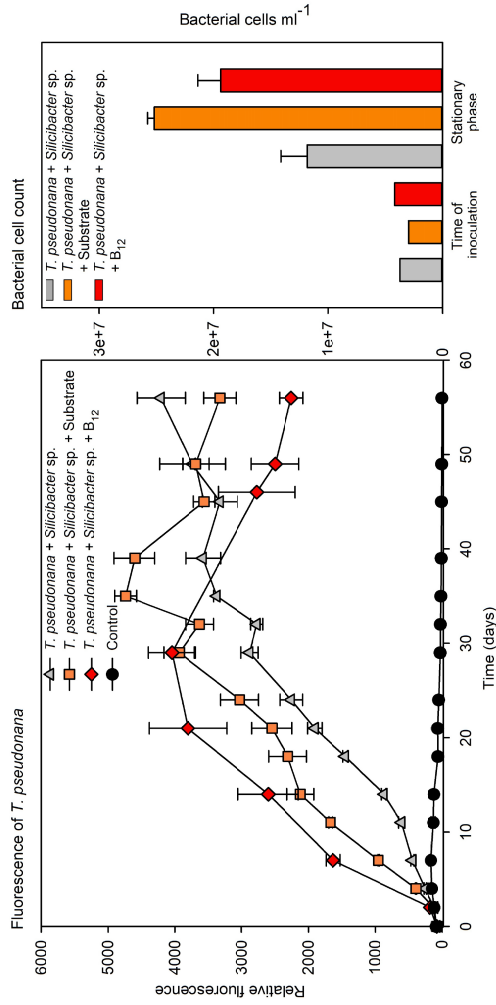

Bacterial cell count

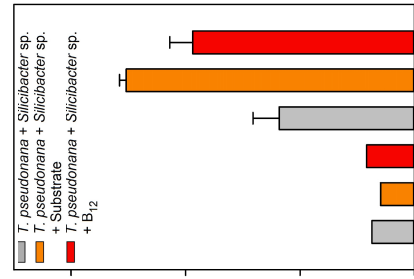

*T. pseudonana* co-culture with *Sulfitobacter* sp. M22

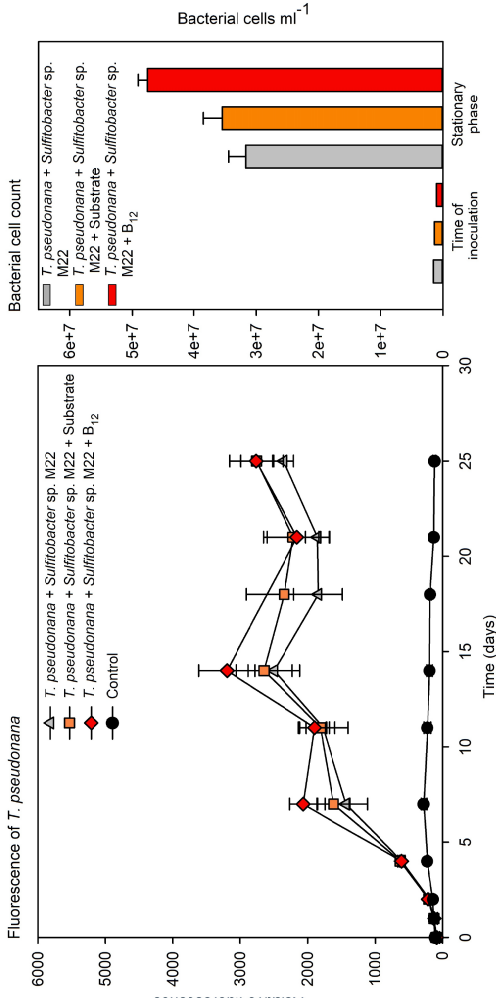

Bacterial cell count

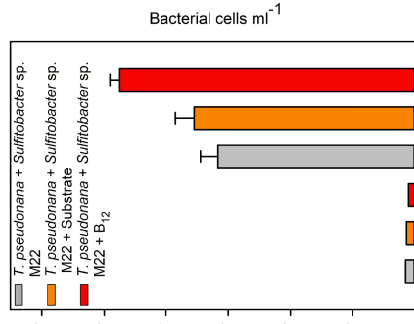

*T. pseudonana* co-culture with *Sulfitobacter* sp. DFL-14

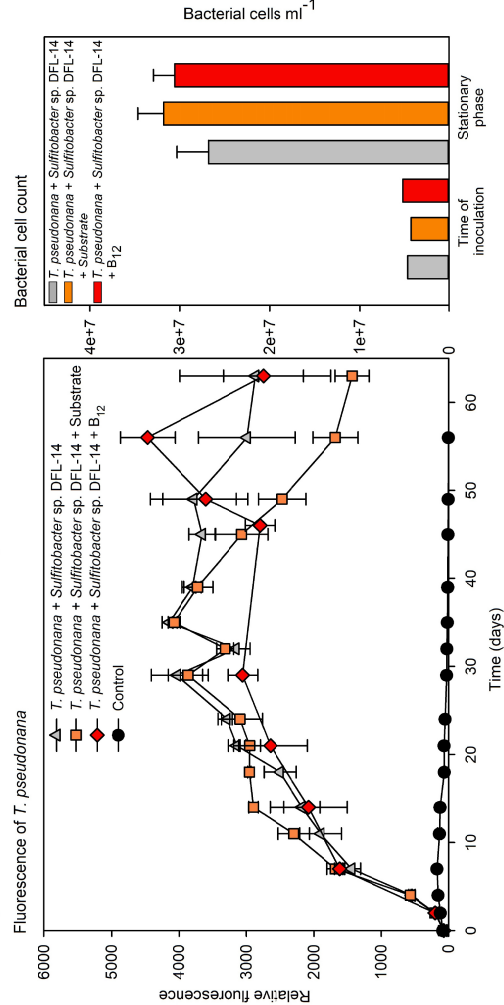

Bacterial cell count

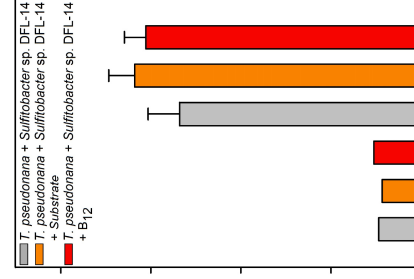

*T. pseudonana* co-culture with *Thalassococcus halodurans* DSM 26915

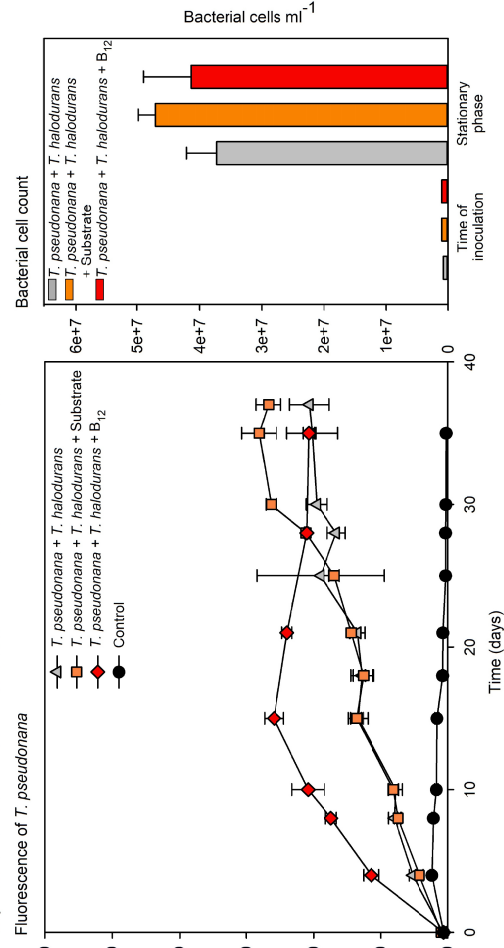

Bacterial cell count

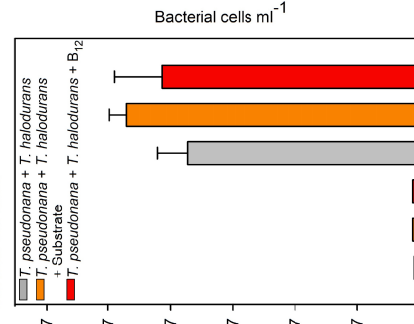

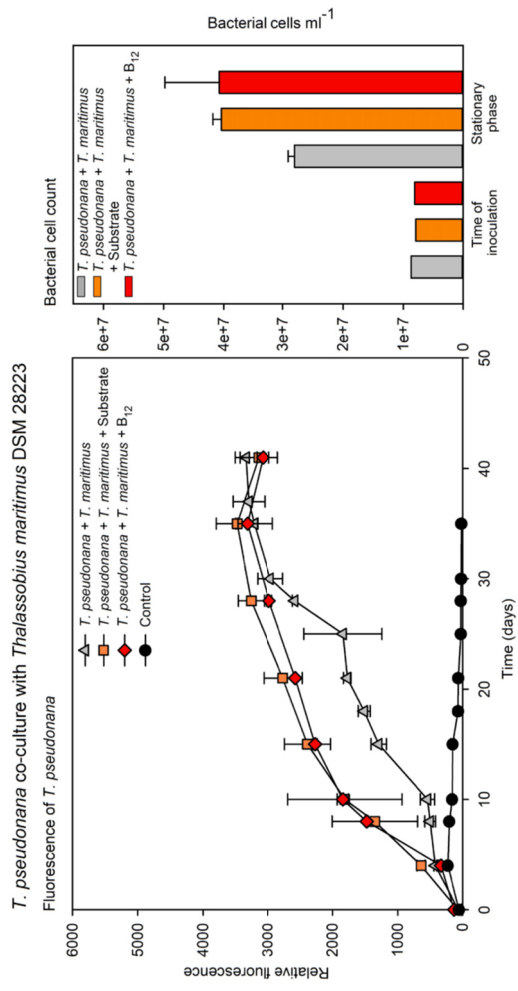

**Supplementary Figure 4:** Depicted are co-cultures of *T. pseudonana* with B<sub>12</sub>-provider strains. (left panels; growth curves) Growth of *T. pseudonana* in co-culture monitored by relative fluorescence unit (RFU) over time with additions of substrate mix (orange square), B<sub>12</sub> (red diamond) or without addition of either (grey triangle). (Right panels; bar plots) Bacterial cell counts in co-cultures at the time of inoculation and early stationary growth phase of *T. pseudonana*.
