# Supplementary material for: Vitamin B12 is not shared by all marine prototrophic bacteria with their environment
Source: PubMed Central journal article supplement (PMC10203341; doi:10.1038/s41396-023-01391-3), 2023-03-13
Supplement: 41396_2023_1391_MOESM9_ESM.pdf [file 41396_2023_1391_MOESM9_ESM.pdf]

*T. pseudonana* co-culture with *Sulfitobacter* sp. M39

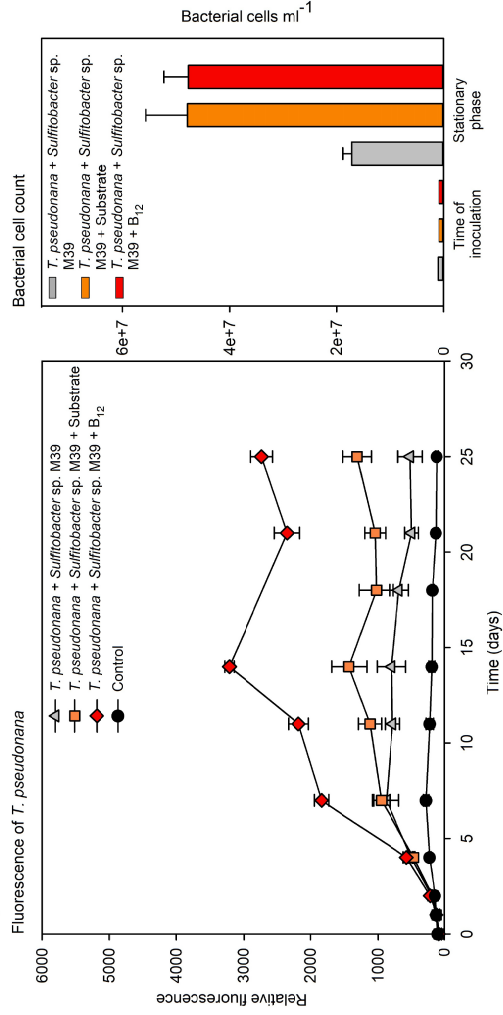

*T. pseudonana* co-culture with *Loktanelia* sp. M215

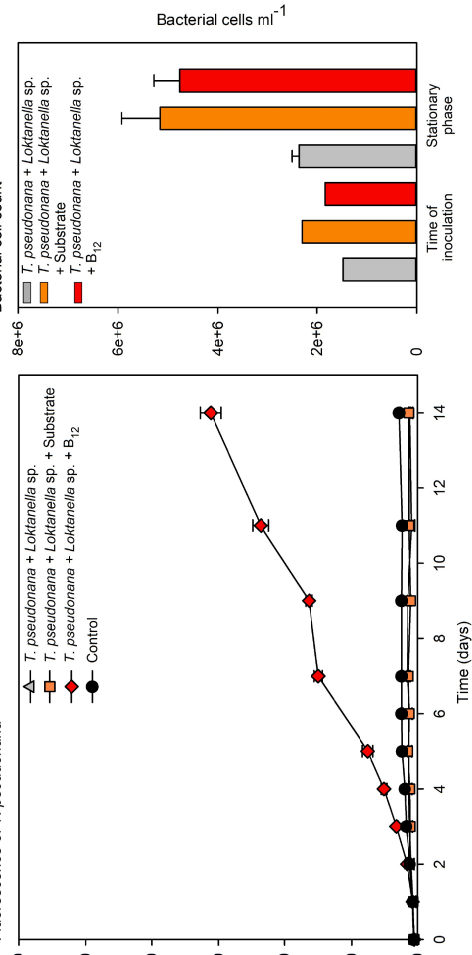

Bacterial cell count

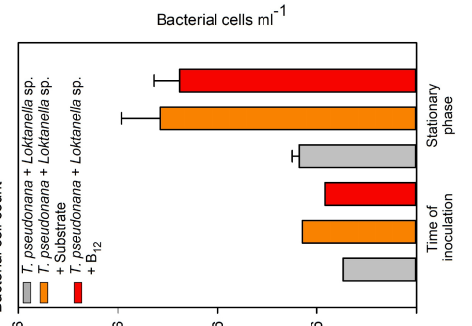

*T. pseudonana* co-culture with *Phaeobacter galliaciensis* DSM 26640

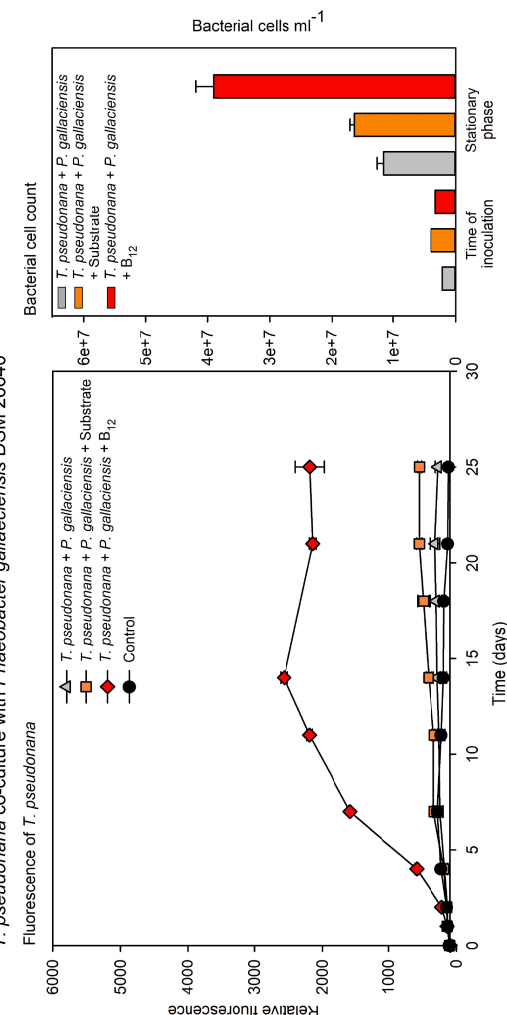

Bacterial cell count

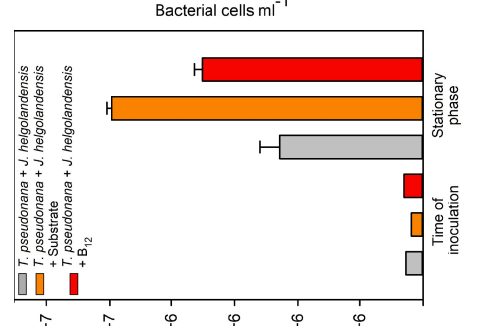

*T. pseudonana* co-culture with *Jannaschia helgolandensis* DSM 14858

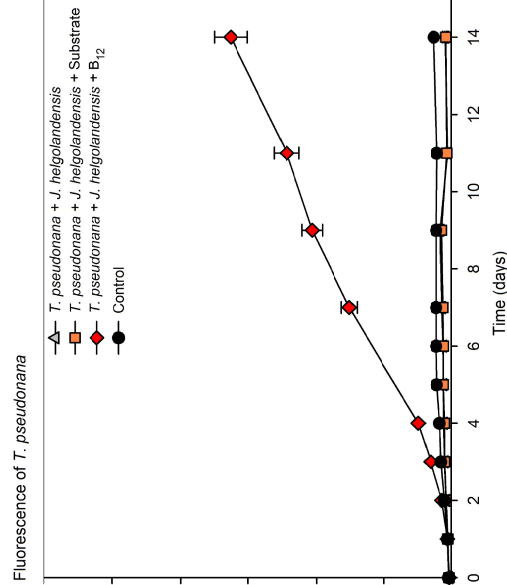

Bacterial cell count



*T. pseudonana* co-culture with *Pseudongicicola xiamenensis* DSM 18339

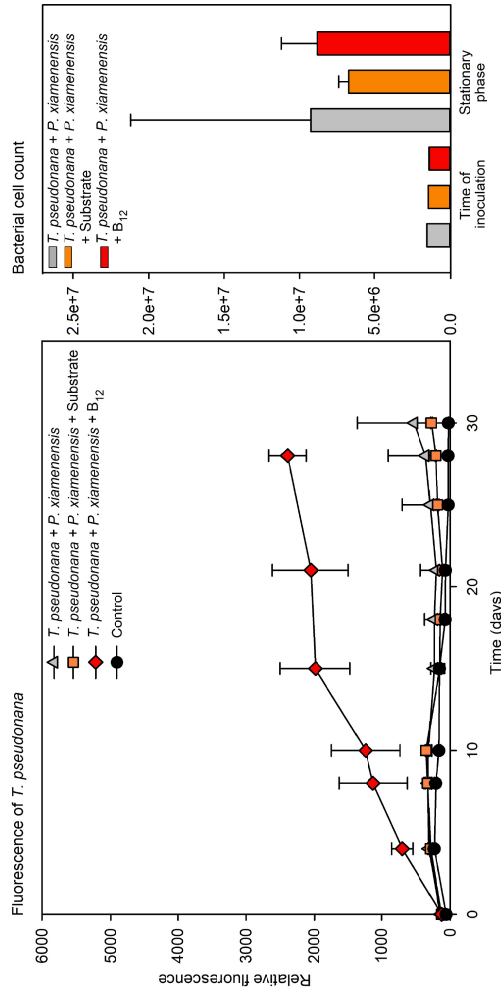

*T. pseudonana* co-culture with *Loktanella salisilacus* DSM 16199

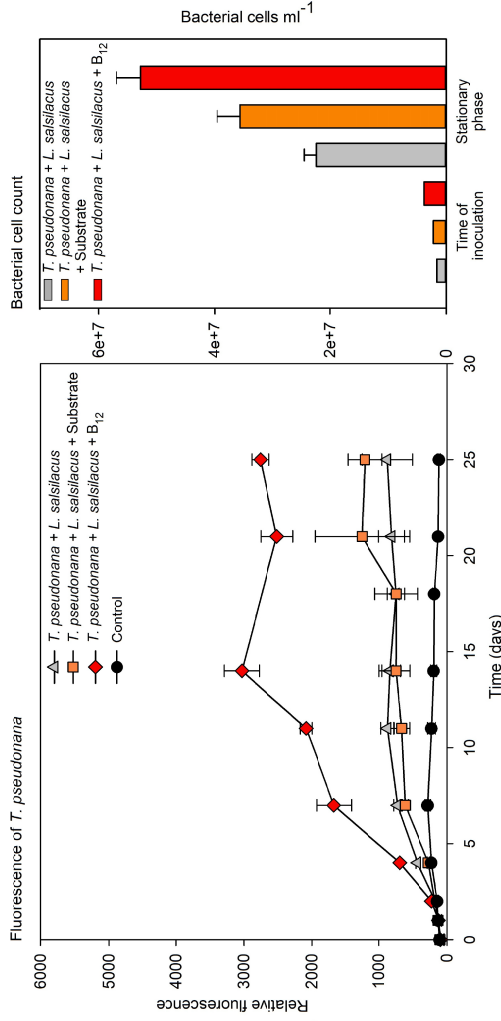

*T. pseudonana* co-culture with *Celeribacter baekdonensis* DSM 27375

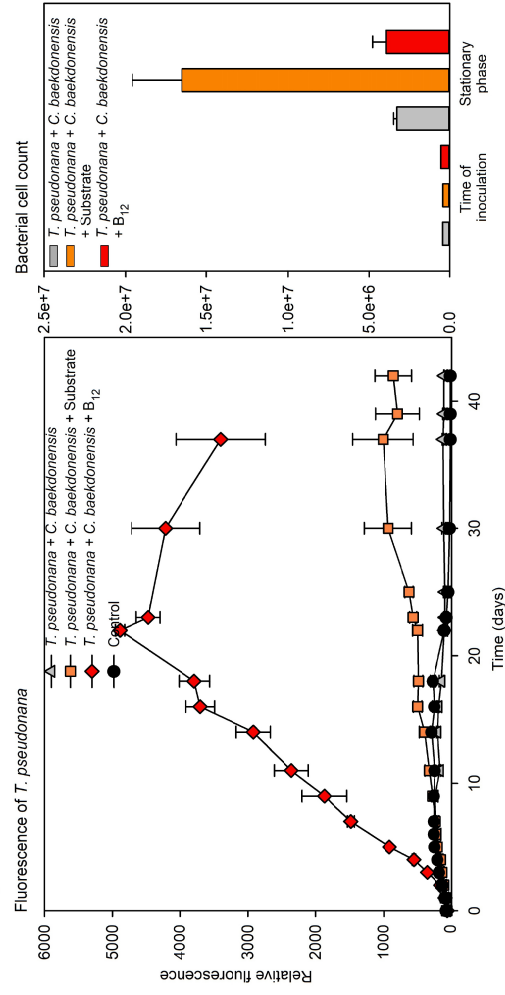

*T. pseudonana* co-culture with *Suffitobacter* sp. M220

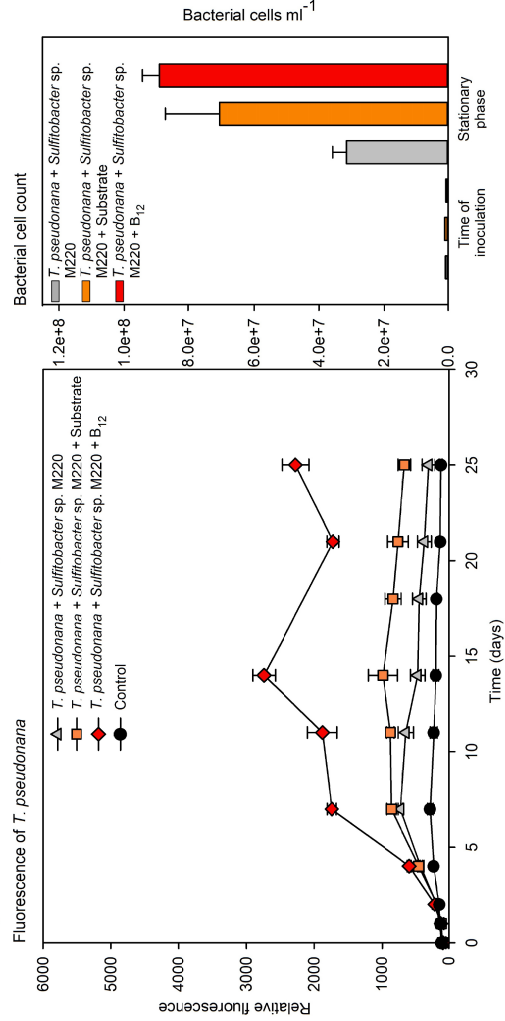

**Supplementary Figure 5:** Depicted are co-cultures of *T. pseudonana* with B<sub>12</sub>-retainer strains. (left panels; growth curves) Growth of *T. pseudonana* in co-culture monitored by relative fluorescence unit (RFU) over time with additions of substrate mix (orange square), B<sub>12</sub> (red diamond) or without addition of either (grey triangle). (Right panels; bar plots) Bacterial cell counts in co-cultures at the time of inoculation and early stationary growth phase of *T. pseudonana*.
