# Supplementary material for: Vitamin B12 is not shared by all marine prototrophic bacteria with their environment
Source: PubMed Central journal article supplement (PMC10203341; doi:10.1038/s41396-023-01391-3), 2023-03-13
Supplement: 41396_2023_1391_MOESM10_ESM.pdf [file 41396_2023_1391_MOESM10_ESM.pdf]

*T. pseudonana* co-culture with *Roseovarius halocynthiae* DSM 27840

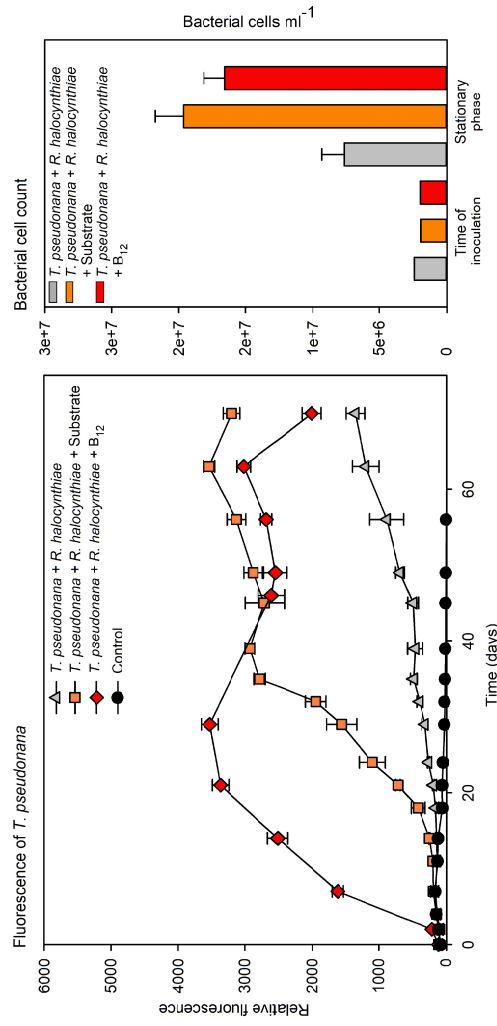

*T. pseudonana* co-culture with *Loktaneilla fryxellensis* DSM 16213

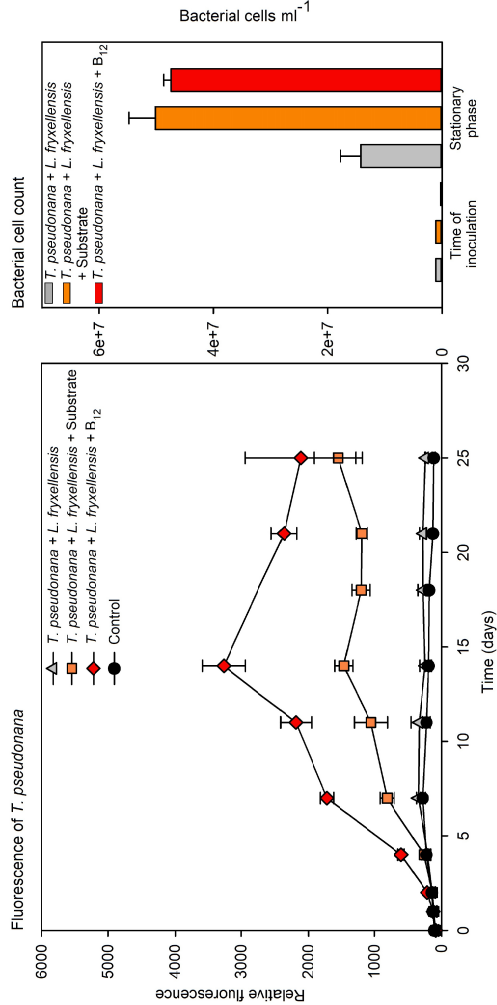

*T. pseudonana* co-culture with *Roseovarius indicus* DSM 26383

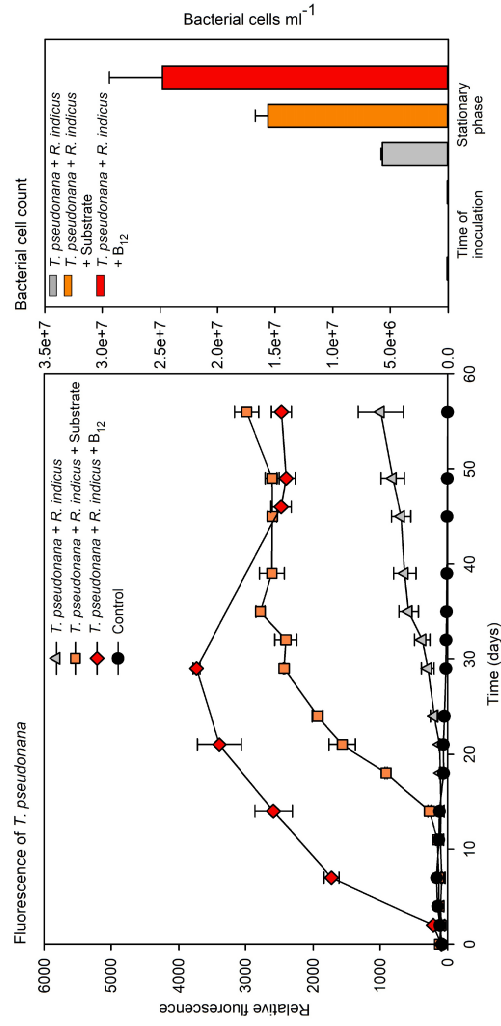

*T. pseudonana* co-culture with *Celeribacter neptunius* DSM 26471

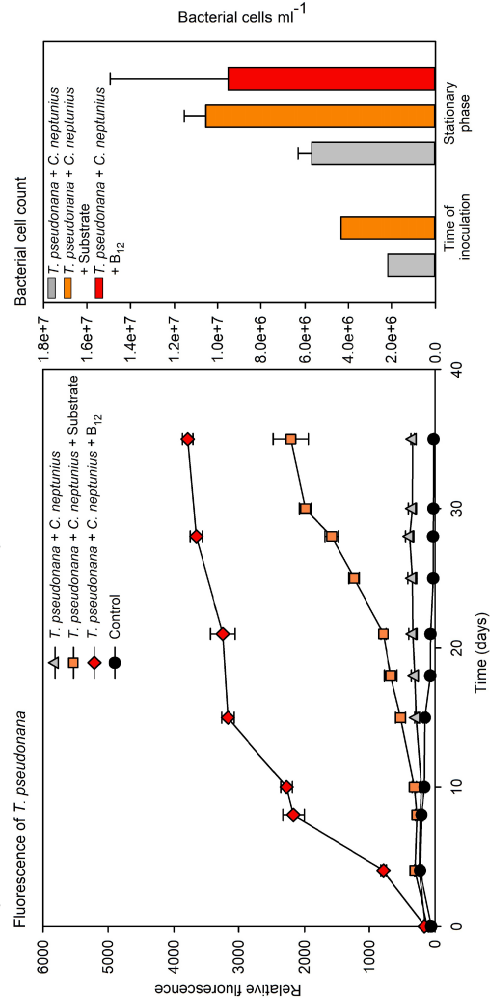

**Supplementary Figure 6:** Depicted are co-cultures of *T. pseudonana* with *B<sub>12</sub>*-prototrophic strains that only promote the growth of *T. pseudonana* with substrate additions. (left panels; growth curves) Growth of *T. pseudonana* in co-culture monitored by relative fluorescence unit (RFU) over time with additions of substrate mix (orange square),  $B_{12}$  (red diamond) or without addition of either (grey triangle). (Right panels; bar plots) Bacterial cell counts in co-cultures at the time of inoculation and early stationary phase of *T. pseudonana*.
